# Supplementary material for: Genes Involved in DNA Damage Cell Pathways and Health of the Oldest-Old (85+)
Source: MDPI journal article supplement (doi:10.3390/genes14091806), 2023-09-15
Supplement: s1 [file s1]

## Supplementary document

The involvement of the 10 selected SNPs in DNA damage cell pathways, and their interrelations were checked and confirmed by using the free software STRING, <https://string-db.org/> STRING is the knowledgebase and software tool for known and predicted protein-protein interactions. It includes direct (physical) and indirect (functional) associations derived from various sources, such as genomic context, high-throughput experiments, (conserved) co-expression and the literature.

List of protein names encoded by the 10 selected candidate genes was imported in the STRING, and then the software weighted and integrated the data and calculated confidence score for all protein interactions. The software built a network from 9 out of the 10 imported genes, and the statistical analysis showed that our network has significantly more protein-protein interactions than expected for a random set of proteins of the same size and degree distribution drawn from the genome ( $p=0.011$ ). Such an enrichment indicates that the proteins are at least partially biologically connected, as a group. Graphically, their interrelation is as follows:

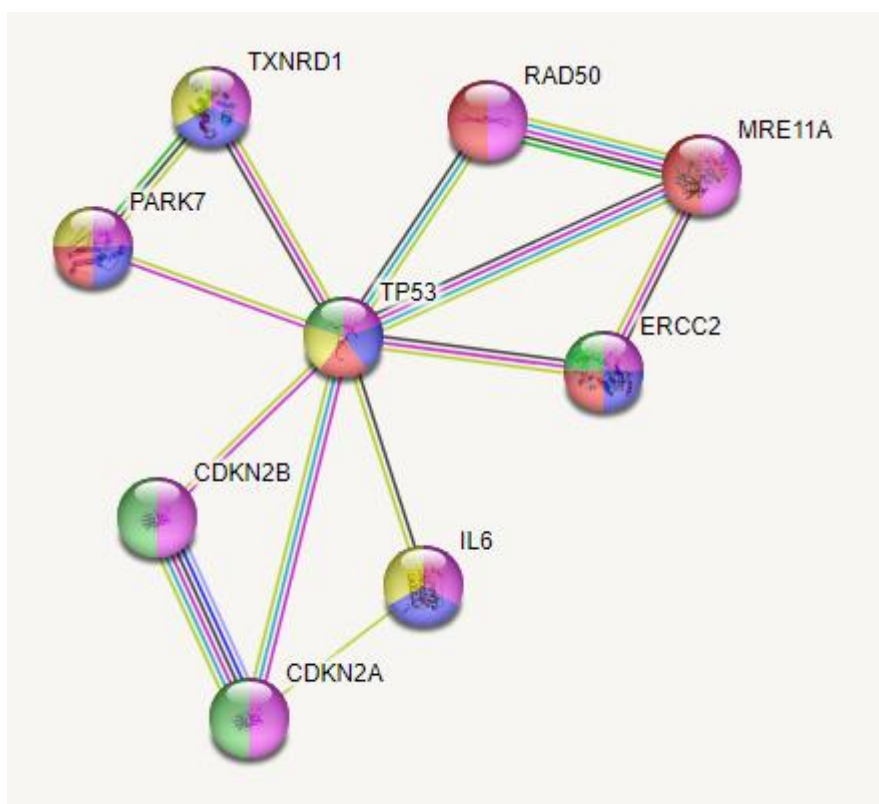

### Network Stats

number of nodes: 9  
number of edges: 13  
average node degree: 2.89  
avg. local clustering coefficient: 0.835

expected number of edges: 6  
PPI enrichment p-value: 0.011  
*your network has significantly more interactions  
than expected (what does that mean?)*

## Functional enrichments in your network

[explain columns](#)

| ▼          | Biological Process (Gene Ontology)                             |                  |          |                      |                                                                                     |
|------------|----------------------------------------------------------------|------------------|----------|----------------------|-------------------------------------------------------------------------------------|
| GO-term    | description                                                    | count in network | strength | false discovery rate |                                                                                     |
| GO:0033554 | Cellular response to stress                                    | 9 of 1725        | 1.05     | 4.23e-06             |  |
| GO:0051052 | Regulation of DNA metabolic process                            | 6 of 360         | 1.56     | 2.11e-05             |                                                                                     |
| GO:0000019 | Regulation of mitotic recombination                            | 3 of 6           | 3.04     | 2.41e-05             |                                                                                     |
| GO:0045935 | Positive regulation of nucleobase-containing compound me...    | 8 of 1927        | 0.96     | 0.00024              |                                                                                     |
| GO:0032392 | DNA geometric change                                           | 4 of 114         | 1.88     | 0.00040              |                                                                                     |
| GO:0071103 | DNA conformation change                                        | 5 of 328         | 1.52     | 0.00040              |                                                                                     |
| GO:0090398 | Cellular senescence                                            | 3 of 33          | 2.3      | 0.00064              |  |
| GO:0006979 | Response to oxidative stress                                   | 5 of 393         | 1.44     | 0.00064              |                                                                                     |
| GO:1901990 | Regulation of mitotic cell cycle phase transition              | 5 of 416         | 1.42     | 0.00064              |                                                                                     |
| GO:0001932 | Regulation of protein phosphorylation                          | 7 of 1459        | 1.02     | 0.00064              |                                                                                     |
| GO:1900117 | Regulation of execution phase of apoptosis                     | 3 of 41          | 2.2      | 0.00085              |                                                                                     |
| GO:0046825 | Regulation of protein export from nucleus                      | 3 of 42          | 2.19     | 0.00085              |                                                                                     |
| GO:1901796 | Regulation of signal transduction by p53 class mediator        | 4 of 182         | 1.68     | 0.00085              |                                                                                     |
| GO:0051054 | Positive regulation of DNA metabolic process                   | 4 of 200         | 1.64     | 0.0010               |                                                                                     |
| GO:0006281 | DNA repair                                                     | 5 of 522         | 1.32     | 0.0011               |  |
| GO:0051338 | Regulation of transferase activity                             | 6 of 1036        | 1.1      | 0.0011               |                                                                                     |
| GO:1901991 | Negative regulation of mitotic cell cycle phase transition     | 4 of 219         | 1.6      | 0.0012               |                                                                                     |
| GO:0051276 | Chromosome organization                                        | 6 of 1066        | 1.09     | 0.0012               |                                                                                     |
| GO:0031860 | Telomeric 3 overhang formation                                 | 2 of 4           | 3.04     | 0.0014               |                                                                                     |
| GO:0034599 | Cellular response to oxidative stress                          | 4 of 244         | 1.55     | 0.0014               |  |
| GO:0051130 | Positive regulation of cellular component organization         | 6 of 1209        | 1.03     | 0.0018               |                                                                                     |
| GO:0007568 | Aging                                                          | 4 of 274         | 1.5      | 0.0020               |  |
| GO:0031401 | Positive regulation of protein modification process            | 6 of 1252        | 1.02     | 0.0020               |                                                                                     |
| GO:0051348 | Negative regulation of transferase activity                    | 4 of 294         | 1.47     | 0.0023               |                                                                                     |
| GO:0010628 | Positive regulation of gene expression                         | 7 of 2337        | 0.81     | 0.0032               |                                                                                     |
| GO:0010604 | Positive regulation of macromolecule metabolic process         | 8 of 3600        | 0.68     | 0.0032               |                                                                                     |
| GO:0051128 | Regulation of cellular component organization                  | 7 of 2402        | 0.8      | 0.0036               |                                                                                     |
| GO:0051352 | Negative regulation of ligase activity                         | 2 of 11          | 2.6      | 0.0039               |                                                                                     |
| GO:1903800 | Positive regulation of production of miRNAs involved in gen... | 2 of 11          | 2.6      | 0.0039               |                                                                                     |
| GO:0032508 | DNA duplex unwinding                                           | 3 of 106         | 1.79     | 0.0039               |                                                                                     |
| GO:2000134 | Negative regulation of G1/S transition of mitotic cell cycle   | 3 of 107         | 1.78     | 0.0039               |                                                                                     |
| GO:0033044 | Regulation of chromosome organization                          | 4 of 359         | 1.38     | 0.0039               |                                                                                     |
| GO:1902510 | Regulation of apoptotic DNA fragmentation                      | 2 of 12          | 2.56     | 0.0042               |                                                                                     |
| GO:0090399 | Replicative senescence                                         | 2 of 13          | 2.52     | 0.0046               |                                                                                     |
| GO:0045893 | Positive regulation of transcription, DNA-templated            | 6 of 1587        | 0.91     | 0.0046               |                                                                                     |
| GO:1903799 | Negative regulation of production of miRNAs involved in ge...  | 2 of 14          | 2.49     | 0.0050               |                                                                                     |
| GO:0090343 | Positive regulation of cell aging                              | 2 of 15          | 2.46     | 0.0051               |                                                                                     |

Since all nine SNPs were located in genes that are centered around the DNA damage repair processes, it is to be expected that they are interconnected (we attach the list of interactions of pairs of our SNPs).

| node1  | node2  | node1 accession | node2 accession | node1 annotation                           | node2 annotation                                     | score |
|--------|--------|-----------------|-----------------|--------------------------------------------|------------------------------------------------------|-------|
| CDKN2A | CDKN2B | ENSP00000418915 | ENSP00000276925 | Cyclin-dependent kinase inhibitor 2A; Act  | Cyclin-dependent kinase 4 inhibitor B; Interacts str | 0.951 |
| CDKN2A | IL6    | ENSP00000418915 | ENSP00000385675 | Cyclin-dependent kinase inhibitor 2A; Act  | Interleukin-6; Cytokine with a wide variety of biolo | 0.621 |
| CDKN2A | MRE11  | ENSP00000418915 | ENSP00000325863 | Cyclin-dependent kinase inhibitor 2A; Act  | Double-strand break repair protein MRE11; Comp       | 0.448 |
| CDKN2A | TP53   | ENSP00000418915 | ENSP00000269305 | Cyclin-dependent kinase inhibitor 2A; Act  | Cellular tumor antigen p53; Acts as a tumor suppres  | 0.999 |
| CDKN2B | CDKN2A | ENSP00000276925 | ENSP00000418915 | Cyclin-dependent kinase 4 inhibitor B; Int | Cyclin-dependent kinase inhibitor 2A; Acts as a neg  | 0.951 |
| CDKN2B | TP53   | ENSP00000276925 | ENSP00000269305 | Cyclin-dependent kinase 4 inhibitor B; Int | Cellular tumor antigen p53; Acts as a tumor suppres  | 0.86  |
| ERCC2  | MRE11  | ENSP00000375809 | ENSP00000325863 | General transcription and DNA repair fact  | Double-strand break repair protein MRE11; Comp       | 0.619 |
| ERCC2  | TP53   | ENSP00000375809 | ENSP00000269305 | General transcription and DNA repair fact  | Cellular tumor antigen p53; Acts as a tumor suppres  | 0.804 |
| IL6    | CDKN2A | ENSP00000385675 | ENSP00000418915 | Interleukin-6; Cytokine with a wide varie  | Cyclin-dependent kinase inhibitor 2A; Acts as a neg  | 0.621 |
| IL6    | TP53   | ENSP00000385675 | ENSP00000269305 | Interleukin-6; Cytokine with a wide varie  | Cellular tumor antigen p53; Acts as a tumor suppres  | 0.777 |
| MRE11  | CDKN2A | ENSP00000325863 | ENSP00000418915 | Double-strand break repair protein MRE1    | Cyclin-dependent kinase inhibitor 2A; Acts as a neg  | 0.448 |
| MRE11  | ERCC2  | ENSP00000325863 | ENSP00000375809 | Double-strand break repair protein MRE1    | General transcription and DNA repair factor IIH heli | 0.619 |
| MRE11  | RAD50  | ENSP00000325863 | ENSP00000368100 | Double-strand break repair protein MRE1    | DNA repair protein RAD50; Component of the MRN       | 0.999 |
| MRE11  | TP53   | ENSP00000325863 | ENSP00000269305 | Double-strand break repair protein MRE1    | Cellular tumor antigen p53; Acts as a tumor suppres  | 0.905 |
| PARK7  | TP53   | ENSP00000340278 | ENSP00000269305 | Protein/nucleic acid deglycase DJ-1; Prote | Cellular tumor antigen p53; Acts as a tumor suppres  | 0.814 |
| PARK7  | TXNRD1 | ENSP00000340278 | ENSP00000434516 | Protein/nucleic acid deglycase DJ-1; Prote | Thioredoxin reductase 1, cytoplasmic; Isoform 1 ma   | 0.493 |
| RAD50  | MRE11  | ENSP00000368100 | ENSP00000325863 | DNA repair protein RAD50; Component of     | Double-strand break repair protein MRE11; Comp       | 0.999 |
| RAD50  | TP53   | ENSP00000368100 | ENSP00000269305 | DNA repair protein RAD50; Component of     | Cellular tumor antigen p53; Acts as a tumor suppres  | 0.709 |
| TP53   | CDKN2A | ENSP00000269305 | ENSP00000418915 | Cellular tumor antigen p53; Acts as a tum  | Cyclin-dependent kinase inhibitor 2A; Acts as a neg  | 0.999 |
| TP53   | CDKN2B | ENSP00000269305 | ENSP00000276925 | Cellular tumor antigen p53; Acts as a tum  | Cyclin-dependent kinase 4 inhibitor B; Interacts str | 0.86  |
| TP53   | ERCC2  | ENSP00000269305 | ENSP00000375809 | Cellular tumor antigen p53; Acts as a tum  | General transcription and DNA repair factor IIH heli | 0.804 |
| TP53   | IL6    | ENSP00000269305 | ENSP00000385675 | Cellular tumor antigen p53; Acts as a tum  | Interleukin-6; Cytokine with a wide variety of biolo | 0.777 |
| TP53   | MRE11  | ENSP00000269305 | ENSP00000325863 | Cellular tumor antigen p53; Acts as a tum  | Double-strand break repair protein MRE11; Comp       | 0.905 |
| TP53   | PARK7  | ENSP00000269305 | ENSP00000340278 | Cellular tumor antigen p53; Acts as a tum  | Protein/nucleic acid deglycase DJ-1; Protein and nu  | 0.814 |
| TP53   | RAD50  | ENSP00000269305 | ENSP00000368100 | Cellular tumor antigen p53; Acts as a tum  | DNA repair protein RAD50; Component of the MRN       | 0.709 |
| TP53   | TXNRD1 | ENSP00000269305 | ENSP00000434516 | Cellular tumor antigen p53; Acts as a tum  | Thioredoxin reductase 1, cytoplasmic; Isoform 1 ma   | 0.609 |
| TXNRD1 | PARK7  | ENSP00000434516 | ENSP00000340278 | Thioredoxin reductase 1, cytoplasmic; Iso  | Protein/nucleic acid deglycase DJ-1; Protein and nu  | 0.493 |
| TXNRD1 | TP53   | ENSP00000434516 | ENSP00000269305 | Thioredoxin reductase 1, cytoplasmic; Iso  | Cellular tumor antigen p53; Acts as a tumor suppres  | 0.609 |

The only SNP not related with others is the one in the TERC gene, but since it encodes an RNA component of the telomerase enzyme, it is therefore not listed in protein databases.
